# Supplementary material for: CIAO observatory main upgrade: building up an ACTRIS compliant aerosol in-situ laboratory
Source: Copernicus journal article supplement (doi:10.5194/amt-2024-57), 2024-05-13
Supplement: Supplementary file [file amt-2024-57-AC1-supplement.pdf]

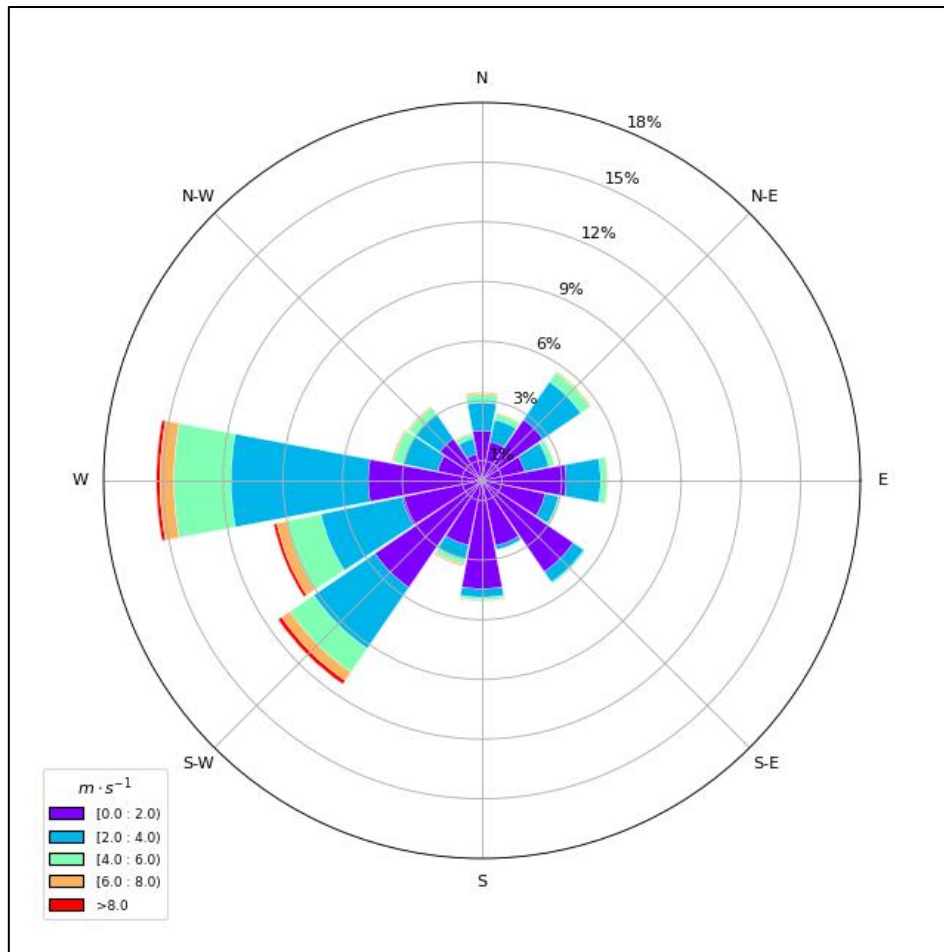

Figure 3: Wind rose diagram at CIAO in 2004-2017 obtained from continuous measurements of the automatic weather station VAISALA MILOS520 with temporal resolution of 1 minute.
